# Supplementary material for: The Success Rate of the Adhesive Partial Fixed Prosthesis after Five Years: A Systematic Review
Source: MDPI journal article supplement (doi:10.3390/prosthesis5010021), 2023-03-07
Supplement: s1 [file s1]

**Table S4.** Data extraction table and descriptive analysis of the included articles.

| AU-<br>THOR/YEAR       | FAILURES           |                        |                             |                           |                  |            |                                              |             |           |                                              |                                                 |
|------------------------|--------------------|------------------------|-----------------------------|---------------------------|------------------|------------|----------------------------------------------|-------------|-----------|----------------------------------------------|-------------------------------------------------|
|                        | RELATIVES          |                        |                             |                           |                  |            | ABSOLUTES                                    |             |           |                                              |                                                 |
|                        | Recementa-<br>tion | Cementa-<br>tion error | Chip-<br>ping of<br>ceramic | Reversi-<br>ble<br>trauma | Poor<br>esthetic | Traum<br>a | Fracture<br>of the<br>abut-<br>ment<br>tooth | Car-<br>ies | Debonding | Periodon-<br>tal/endo-<br>dontic<br>problems | Fracture of<br>the pros-<br>thesis<br>framework |
| Aggstaller et al. 2008 | 4                  |                        | 1                           |                           | 1                | 2          | 1                                            | 1           | 2         |                                              |                                                 |
| Behr et al. 1998       | 2                  | 4                      | 1                           |                           |                  |            |                                              |             |           |                                              |                                                 |
| Botelho et al. 2014    | 19                 |                        | 2                           |                           |                  |            | 2                                            | 4           | 16        | 3                                            |                                                 |
| Garnett et al. 2006    |                    |                        | 1                           |                           |                  | 6          |                                              |             | 24        |                                              |                                                 |
| Kern 2005              |                    |                        |                             | 1                         |                  | 1          |                                              |             |           |                                              | 8                                               |
| Kern 2017              |                    |                        |                             |                           |                  |            |                                              |             |           |                                              | 4                                               |
| Kern et al. 2017       | 6                  |                        | 3                           | 3                         |                  | 1          |                                              |             |           |                                              |                                                 |
| Sailer et al. 2013     |                    |                        | 2                           |                           |                  |            |                                              |             |           |                                              |                                                 |
| Sasse & Kern 2013      |                    |                        |                             | 1                         |                  |            |                                              | 1           | 3         |                                              |                                                 |
| Sasse & Kern 2014      |                    |                        |                             |                           |                  |            |                                              | 1           | 2         |                                              |                                                 |
| Younes et al. 2013     |                    |                        |                             |                           |                  |            |                                              | 3           | 6         | 1                                            |                                                 |
