# Supplementary material for: The Success Rate of the Adhesive Partial Fixed Prosthesis after Five Years: A Systematic Review
Source: MDPI journal article supplement (doi:10.3390/prosthesis5010021), 2023-03-07
Supplement: s1 [file s1]

Archive with 8 entries (8 files):
- prosthesis-2217519-Figure S1.tif
- prosthesis-2217519-Figure S2.tif
- prosthesis-2217519-Figure S3.tif
- prosthesis-2217519-Table S1.pdf
- prosthesis-2217519-Table S2.pdf
- prosthesis-2217519-Table S3.pdf
- prosthesis-2217519-Table S4.pdf
- prosthesis-2217519-Table S5.pdf
