# Supplementary material for: The Success Rate of the Adhesive Partial Fixed Prosthesis after Five Years: A Systematic Review
Source: MDPI journal article supplement (doi:10.3390/prosthesis5010021), 2023-03-07
Supplement: s1 [file s1]

**Table S2.** Evaluation of the Quality of Studies.

|                        | REPORT | EXTERNAL VA-<br>LIDITY | INTERNAL VA-<br>LIDITY - BIAS | INTERNAL VA-<br>LIDITY - CONFU-<br>SION | POWER | TOTAL PONTU-<br>ATION |
|------------------------|--------|------------------------|-------------------------------|-----------------------------------------|-------|-----------------------|
| Aggstaller et al. 2008 | 8      | 2                      | 3                             | 4                                       | 0     | 17                    |
| Behr et al. 1998       | 7      | 2                      | 3                             | 3                                       | 0     | 16                    |
| Botelho et al. 2014    | 7      | 2                      | 3                             | 3                                       | 0     | 15                    |
| Garnett et al. 2006    | 7      | 2                      | 2                             | 4                                       | 0     | 15                    |
| Kern 2005              | 6      | 2                      | 4                             | 3                                       | 0     | 15                    |
| Kern 2017              | 7      | 2                      | 4                             | 3                                       | 0     | 16                    |
| Kern et al. 2017       | 8      | 2                      | 4                             | 3                                       | 0     | 17                    |
| Sailer et al. 2013     | 7      | 2                      | 4                             | 5                                       | 0     | 18                    |
| Sasse & Kern 2013      | 8      | 2                      | 4                             | 5                                       | 0     | 19                    |
| Sasse & Kern 2014      | 8      | 2                      | 4                             | 3                                       | 0     | 17                    |
| Younes et al. 2013     | 8      | 2                      | 3                             | 5                                       | 0     | 18                    |
