# Supplementary material for: The Success Rate of the Adhesive Partial Fixed Prosthesis after Five Years: A Systematic Review
Source: MDPI journal article supplement (doi:10.3390/prosthesis5010021), 2023-03-07
Supplement: s1 [file s1 › prosthesis-2217519-Table S1.pdf]

**Table S1.** Research question PICOT.

|                                                                                                                                                                                                                                     |                                       |
|-------------------------------------------------------------------------------------------------------------------------------------------------------------------------------------------------------------------------------------|---------------------------------------|
| In a partially edentulous population (P) the realization of adhesive partial fixed prosthesis (I), compared to conventional partial fixed prosthesis (C), have superior clinical results (O) in a minimum follow-up of 5 years (T)? |                                       |
| <i>Population (P)</i>                                                                                                                                                                                                               | Partially edentulous population       |
| <i>Intervention (I)</i>                                                                                                                                                                                                             | adhesive partial fixed prosthesis     |
| <i>Comparison (C)</i>                                                                                                                                                                                                               | conventional partial fixed prosthesis |
| <i>Outcomes (O)</i>                                                                                                                                                                                                                 | clinical results                      |
| <i>Time (T)</i>                                                                                                                                                                                                                     | minimum follow-up of 5 years          |
