# Supplementary material for: The Success Rate of the Adhesive Partial Fixed Prosthesis after Five Years: A Systematic Review
Source: MDPI journal article supplement (doi:10.3390/prosthesis5010021), 2023-03-07
Supplement: s1 [file s1 › prosthesis-2217519-Table S3.pdf]

**Table S3.** Patient data extraction table.

| AUTHOR/YEAR            | TOTAL NUMBER<br>OF PATIENTS | GENDER |      | AVERAGE AGE<br>(YEARS) |
|------------------------|-----------------------------|--------|------|------------------------|
|                        |                             | Female | Male |                        |
| Aggstaller et al. 2008 | 69                          | 33     | 36   | 49                     |
| Behr et al. 1998       | 130                         | 66     | 64   | 31.5                   |
| Botelho et al. 2014    | 153                         | 85     | 68   | 55.4                   |
| Garnett et al. 2006    | 45                          | 31     | 14   | 17.6                   |
| Kern 2005              | 37                          | NR     | NR   | NR                     |
| Kern 2017              | 22                          | 6      | 16   | 33.3                   |
| Kern et al.2017        | 87                          | 53     | 34   | 32                     |
| Sailer et al. 2013     | 40                          | 24     | 16   | 35.5                   |
| Sasse & Kern 2013      | 25                          | 17     | 8    | 33.3                   |
| Sasse & Kern 2014      | 42                          | 25     | 17   | 32.7                   |
| Younes et al. 2013     | 37                          | 27     | 10   | 32.2                   |

NR = not reported.
