# Supplementary material for: The Success Rate of the Adhesive Partial Fixed Prosthesis after Five Years: A Systematic Review
Source: MDPI journal article supplement (doi:10.3390/prosthesis5010021), 2023-03-07
Supplement: s1 [file s1 › prosthesis-2217519-Table S5.pdf]

**Table S5.** Descriptive analysis.

|              | Adhesive partial<br>fixed prostheses<br>(n) | Average Age<br>(μ) | Individuals<br>(n) | Follow-up<br>medium | Location (n)                                                     | Failures (n) |
|--------------|---------------------------------------------|--------------------|--------------------|---------------------|------------------------------------------------------------------|--------------|
| <b>Total</b> | 783                                         | 32.05 years        | 687                | 8.2 years           | Maxilla: 378<br>Mandible: 174<br>Anterior: 430<br>Posterior: 140 | 142          |
