# Supplementary figures and images for: The Success Rate of the Adhesive Partial Fixed Prosthesis after Five Years: A Systematic Review
Source: MDPI journal article supplement (doi:10.3390/prosthesis5010021), 2023-03-07

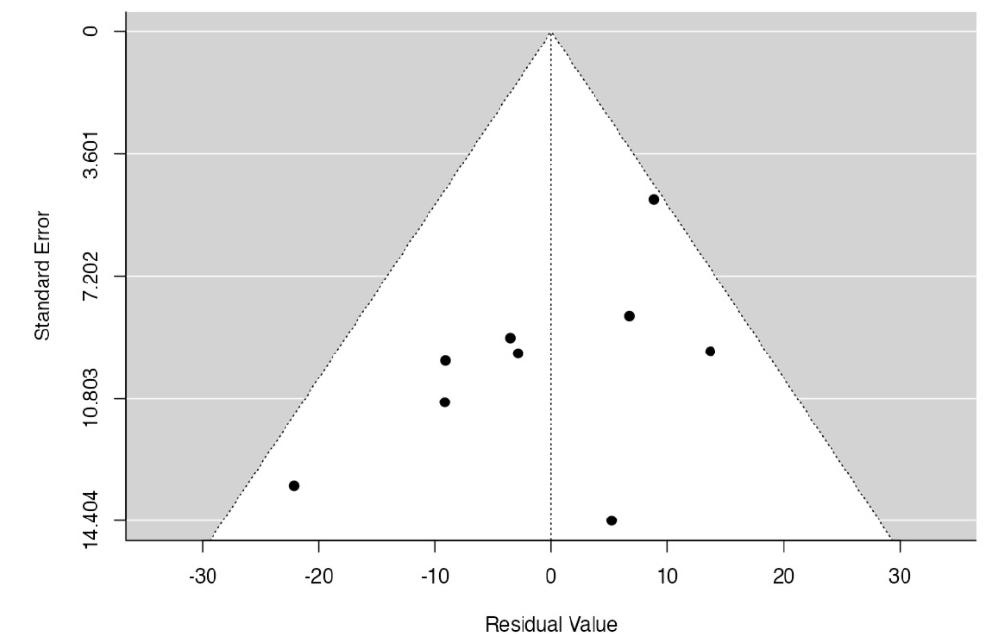

Supplement: s1 [file s1 › prosthesis-2217519-Figure S1.tif]

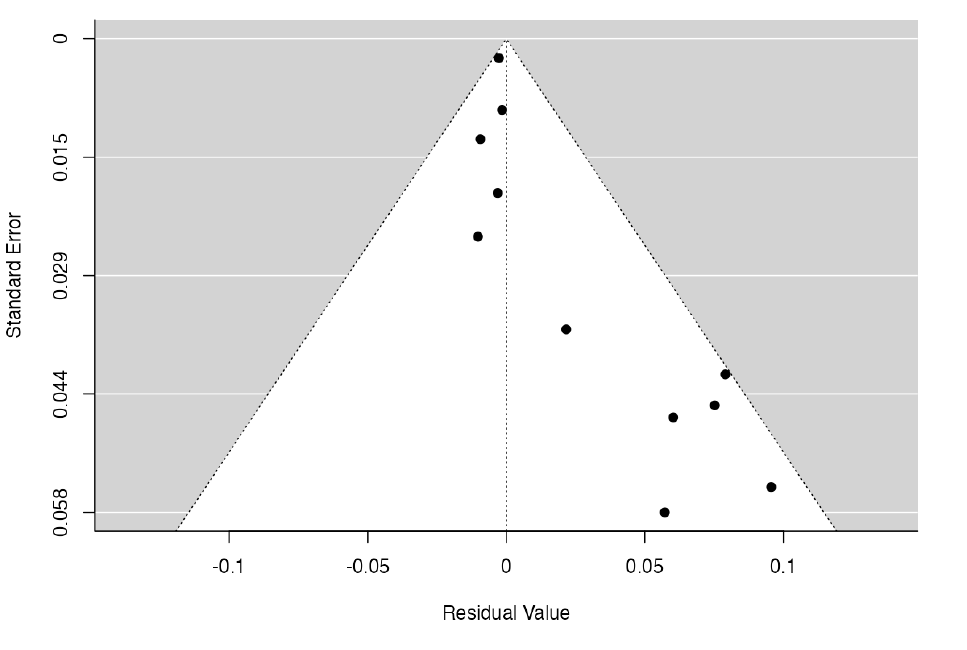

Supplement: s1 [file s1 › prosthesis-2217519-Figure S2.tif]

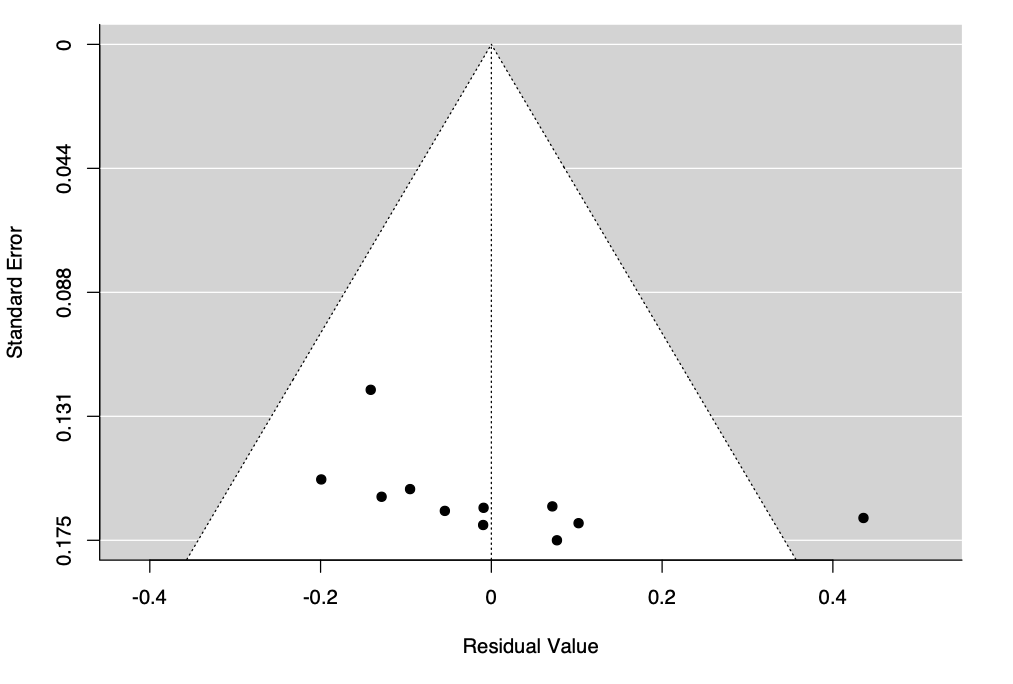

Supplement: s1 [file s1 › prosthesis-2217519-Figure S3.tif]
